# Supplementary material for: The lysosomal cathepsin protease CPL-1 plays a leading role in phagosomal degradation of apoptotic cells in Caenorhabditis elegans
Source: PubMed Central journal article supplement — Mol Biol Cell. 2014 Jul 1;25(13):2071–83. doi: 10.1091/mbc.E14-01-0015 (PMC4072580; doi:10.1091/mbc.e14-01-0015), 2014-07-01

# Supplemental Materials

*Molecular Biology of the Cell*

Xu et al.

## Supplemental Materials

**Figure S1.** Expression of wild-type and mutant CPL-1 tagged with mChOint in germline sheath cells and hypodermis. Representative DIC and fluorescence images are shown for *yqEx688* (CPL-1, WT), *yqEx690* (CPL-1, del51), *yqEx743* (CPL-1, C144A) and *yqEx746* (CPL-1, G230R). Bars, 10  $\mu\text{m}$ .

**Figure S2.** qRT-PCR evaluation of RNAi effect on mRNAs of some lysosomal cathepsins. 12 cathepsins as indicated were randomly chosen for examination of mRNA levels after RNAi treatment. qRT-PCR was performed by using mRNAs isolated from RNAi-treated animals that were also scored for germ cell corpses. Data were derived from three repeats. Comparisons were performed between control RNAi (Ctrl RNAi) and individual cathepsin RNAi (cathepsin RNAi) using unpaired *t*-test. \*\*  $p < 0.01$ . \*\*\*  $p < 0.001$ .

Figure S1

Germline sheath cells

DIC

CPL-1::mChOint

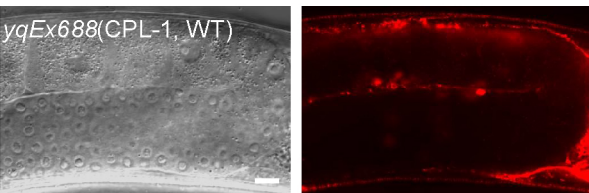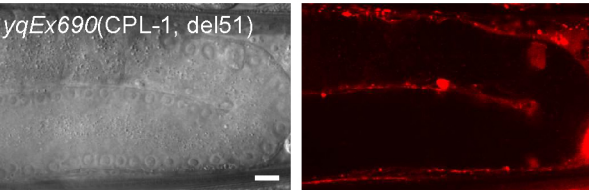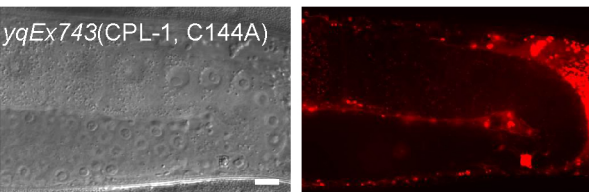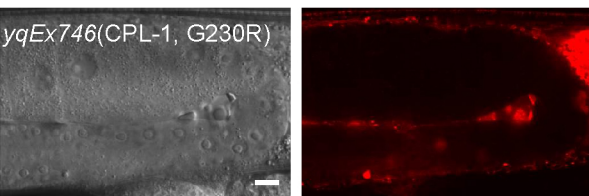

Hypodermis

DIC

CPL-1::mChOint

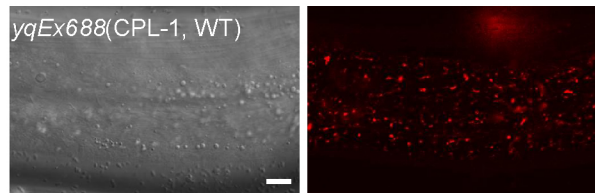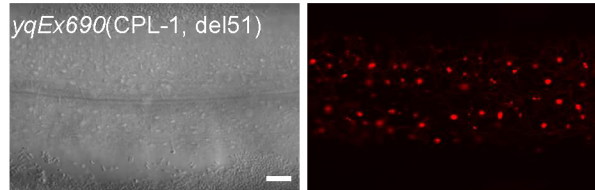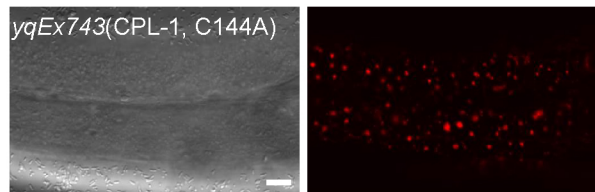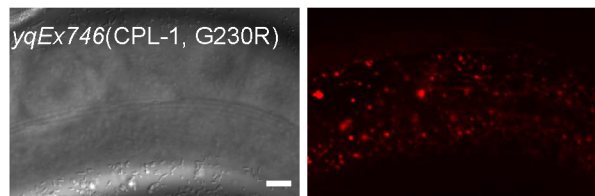

Figure S2

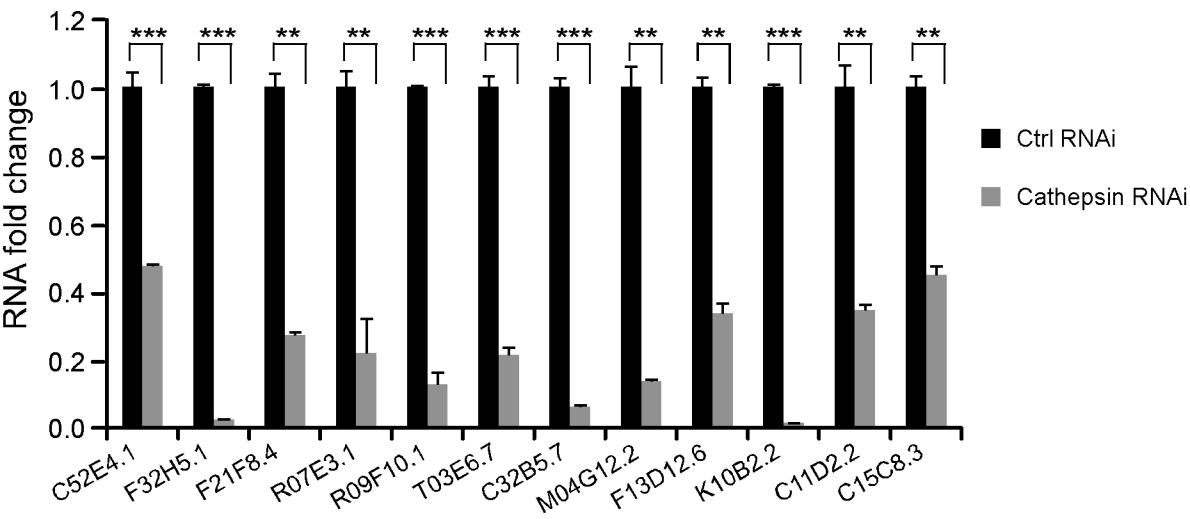

Supplement: supp_E14-01-0015_CombinedSupMats.pdf [file supp_E14-01-0015_CombinedSupMats.pdf]
